# Supplementary material
Source: PubMed Central journal article supplement (PMC8501538)
Supplement: NIHMS1665645-supplement-3.pdf [file NIHMS1665645-supplement-3.pdf]

**Table S1: Hazard ratios for freedom from recurrence and overall survival for each marker if altered by consensus scoring (n=399):**

| Marker                   | Hazard Ratio (95% Confidence Interval) |                  |
|--------------------------|----------------------------------------|------------------|
|                          | FFR                                    | OS               |
| p53                      | 1.3 (0.85, 1.9)                        | 1.01 (0.69, 1.5) |
| p21                      | 1.4 (0.87, 2.3)                        | 1.3 (0.86, 2.0)  |
| p16                      | 1.03 (0.69, 1.5)                       | 1.01 (0.71, 1.4) |
| Rb                       | 0.96 (0.60, 1.5)                       | 0.82 (0.53, 1.3) |
| Rb Altered vs. Wild-type | 2.3 (0.69, 7.4)                        | 1.1 (0.49, 2.4)  |
| cyclin D1                | 1.05 (0.39, 2.9)                       | 1.7 (0.87, 3.4)  |
| Ecad                     | 1.4 (0.70, 2.7)                        | 1.4 (0.78, 2.5)  |
| EGFR                     | 1.5 (0.82, 2.6)                        | 1.1 (0.68, 1.7)  |
| Her2                     | 1.2 (0.64, 2.4)                        | 0.96 (0.50, 1.8) |
| VEGF                     | 0.55 (0.15, 2.0)                       | 0.58 (0.19, 1.8) |
| Ki-67 High vs. Low       | 1.4 (0.81, 2.4)                        | 1.3 (0.87, 2.1)  |
